# Supplementary material for: Facile Synthesis of Hierarchical CoSeO3‧2H2O Nanoflowers Assembled by Nanosheets as a Novel Anode Material for High-Performance Lithium-Ion Batteries
Source: MDPI journal article supplement (doi:10.3390/nano12142474), 2022-07-19
Supplement: s1 [file s1]

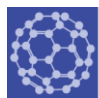

# Facile Synthesis of Hierarchical $\text{CoSeO}_3 \cdot 2\text{H}_2\text{O}$ Nanoflowers Assembled by Nanosheets as a Novel Anode Material for High-Performance Lithium-ion Batteries

Xiao-Xu Ji <sup>1</sup>, Qing-Huai Zhao <sup>1</sup>, Hao Chen <sup>2</sup>, Xin-Wei Luo <sup>2</sup>, Yi Shang <sup>2</sup> and Xiao-Di Liu <sup>2,\*</sup>

<sup>1</sup> College of Physics and Electronic Engineering, Nanyang Normal University, Nanyang, 473061, China; xxji2010@163.com (X.-X.J.); zqh1262022@126.com (Q.-H.Z.);

<sup>2</sup> College of Chemistry and Pharmaceutical Engineering, Nanyang Normal University, Nanyang, 473061, China; xiaohao819@126.com (H.C.); 17527755065@163.com (X.-W.L.); s3030199101@163.com (Y.S.);

\* Correspondence: 20122029@nynu.edu.cn

**Abstract:** As novel anodic materials for lithium-ion batteries (LIBs), transitional metal selenites can transform into metal oxide/selenide heterostructures in the first cycle, which can help to enhance the  $\text{Li}^+$  storage performance, especially high discharge capacity. Herein, well-defined hierarchical  $\text{CoSeO}_3 \cdot 2\text{H}_2\text{O}$  nanoflowers assembled by 10-nm-thick nanosheets are successfully synthesized *via* a facile one-step hydrothermal method. When used as anodic material for LIBs, the  $\text{CoSeO}_3 \cdot 2\text{H}_2\text{O}$  nanoflowers exhibit a considerable high discharge capacity of 1064.1 mAh  $\text{g}^{-1}$  at a current density of 0.1 A  $\text{g}^{-1}$ . In addition, the obtained anode possesses good rate capability and cycling stability. Owing to the superior electrochemical properties, the  $\text{CoSeO}_3 \cdot 2\text{H}_2\text{O}$  nanoflowers would be served as promising anodic materials for high-performance LIBs.

**Citation:** Ji, X.-X.; Zhao, Q.-H.; Chen, H.; Luo, X.-W.; Shang, Y.; Liu, X.-D.

Facile Synthesis of Hierarchical  $\text{CoSeO}_3 \cdot 2\text{H}_2\text{O}$  Nanoflowers Assembled by Nanosheets as a Novel Anode Material for High-Performance Lithium-ion Batteries. *Nanomaterials*

2022, 12, 2474. <https://doi.org/10.3390/nano12142474>

Academic Editor: Cheol-Min Park

Received: 8 June 2022

Accepted: 18 July 2022

Published: 19 July 2022

**Publisher's Note:** MDPI stays neutral with regard to jurisdictional claims in published maps and institutional affiliations.

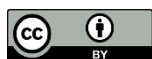

**Copyright:** © 2022 by the authors. Submitted for possible open access publication under the terms and conditions of the Creative Commons Attribution (CC BY) license (<https://creativecommons.org/licenses/by/4.0/>).

**Keywords:** hydrothermal method;  $\text{CoSeO}_3 \cdot 2\text{H}_2\text{O}$ ; nanoflowers; nanosheets; lithium-ion batteries

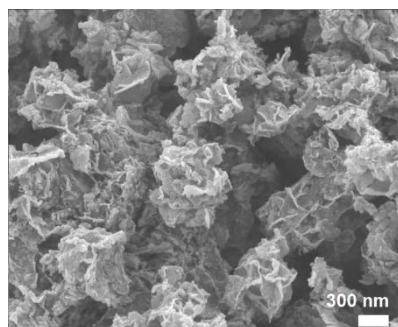

**Figure S1.** FESEM image of the  $\text{CoSeO}_3 \cdot 2\text{H}_2\text{O}$  electrode after 180 cycles at  $0.5 \text{ A g}^{-1}$ .

**Table S1.** The comparison of the electrochemical performance the  $\text{CoSeO}_3 \cdot 2\text{H}_2\text{O}$  nanoflowers and other previously reported Co,Se-based anodes for LIBs.

| Sample                                                                     | Discharge Capacity                              | Cyclability                                              | Ref.      |
|----------------------------------------------------------------------------|-------------------------------------------------|----------------------------------------------------------|-----------|
| $\text{CoSeO}_3 \cdot 2\text{H}_2\text{O}$ nanoflowers                     | $765.5 \text{ mAh g}^{-1} (1 \text{ A g}^{-1})$ | $626 \text{ mAh g}^{-1} / 180\text{th} (0.5 \text{ C})$  | this work |
| CoSe <sub>2</sub> decorated NbSe <sub>2</sub> nanosheets                   | $466 \text{ mAh g}^{-1} (1 \text{ A g}^{-1})$   | $364.7 \text{ mAh g}^{-1} / 1500\text{th} (5 \text{ C})$ | [1]       |
| CoSe <sub>2</sub> @MXene                                                   | $763 \text{ mAh g}^{-1} (1 \text{ A g}^{-1})$   | $910 \text{ mAh g}^{-1} / 100\text{th} (0.2 \text{ C})$  | [2]       |
| ZnSe/CoSe <sub>2</sub> @N-C composites                                     | $399.6 \text{ mAh g}^{-1} (1 \text{ A g}^{-1})$ | $755 \text{ mAh g}^{-1} / 100\text{th} (0.1 \text{ C})$  | [3]       |
| ZnSe/CoSe <sub>2</sub> -C                                                  | $579 \text{ mAh g}^{-1} (0.8 \text{ A g}^{-1})$ | $700 \text{ mAh g}^{-1} / 500\text{th} (1 \text{ C})$    | [4]       |
| Mesoporous hollow Co <sub>3</sub> O <sub>4</sub> hierarchical architecture | $629.4 \text{ mAh g}^{-1} (1 \text{ A g}^{-1})$ | $555.7 \text{ mAh g}^{-1} / 1000\text{th} (1 \text{ C})$ | [5]       |
| Porous Co <sub>3</sub> O <sub>4</sub> spheres                              | $399.6 \text{ mAh g}^{-1} (1 \text{ A g}^{-1})$ | $230 \text{ mAh g}^{-1} / 1000\text{th} (2 \text{ C})$   | [6]       |
| Urchin-like CoSe <sub>2</sub>                                              | $390 \text{ mAh g}^{-1} (1 \text{ A g}^{-1})$   | $410 \text{ mAh g}^{-1} / 1800\text{th} (1 \text{ C})$   | [7]       |
| NiCo <sub>2</sub> O <sub>4</sub> Hollow Spheres                            | $662 \text{ mAh g}^{-1} (1 \text{ A g}^{-1})$   | $706 \text{ mAh g}^{-1} / 100\text{th} (0.2 \text{ C})$  | [8]       |
| MoSe <sub>2</sub> /MoO <sub>2</sub> Composite                              | $741 \text{ mAh g}^{-1} (1 \text{ A g}^{-1})$   | $547 \text{ mAh g}^{-1} / 300\text{th} (2 \text{ C})$    | [9]       |

## References:

- [1] Zhang, J.L.; Du, C.F.; Zhao, J.; Ren, H.; Liang, Q.H.; Zheng Y.; Madhavi, S.; Wang, X.; Zhu, J. W.; Yan, Q. Y. CoSe<sub>2</sub>-decorated NbSe<sub>2</sub> nanosheets fabricated via cation exchange for Li storage. *ACS Appl. Mater. Inter.* **2018**, *10*, 37773–37778.
- [2] Hong, L.; Ju S.L.; Yang, Y.H.; Zheng, J.N.; Xia, G.L.; Huang, Z.G.; Liu, X.Y.; Yu, X. B. Hollow-shell structured porous CoSe<sub>2</sub> microspheres encapsulated by MXene nanosheets for advanced lithium storage. *Sustain. Energy Fuels* **2020**, *4*, 2352–2362.
- [3] Hu, X.J.; Liu, X.J.; Chen, K.; Wang, G.; Wang, H. Core-shell MOF-derived N-doped yolk-shell carbon nanocages homogenously filled with ZnSe and CoSe<sub>2</sub> nanodots as excellent anode materials for lithium- and sodium-ion batteries. *J. Mater. Chem. A* **2019**, *7*, 11016–11037.
- [4] Wang, K.; Wang, Y.P.; Zhang, Y.F.; Liu, F.; Shi, J.R.; Liu, S.Y.; Xie, X.F.; Cao, G.Z.; Pan, A.Q. Bimetallic organic framework derivation of three dimensional and heterogeneous metal selenides/carbon composites as advanced anodes for lithium-ion batteries. *Nanoscale* **2020**, *12*, 12623–12631.
- [5] Wang, G.Y.; Zhang, M.; Deng, Z.P.; Zhang, X.F.; Huo, L.H.; Gao, S. Poplar branch bio-template synthesis of mesoporous hollow Co<sub>3</sub>O<sub>4</sub> hierarchical architecture as an anode for long-life lithium ion batteries. *Ceram. Int.* **2020**, *46*, 29033–29040.
- [6] Feng, Y.; Cao, C.Y.; Zeng, J.; Wang, R.C.; Peng, C.Q.; Wang, X.F. Hierarchical porous Co<sub>3</sub>O<sub>4</sub> spheres fabricated by modified solvothermal method as anode material in Li-ion batteries. *Trans. Nonferrous Met. Soc. China* **2022**, *32*, 1253–1260.
- [7] Zhang, K.; Park, M.; Zhou, L.; Lee, G.H.; Li, W.; Kang, Y.M.; Chen, J. Urchin-like CoSe<sub>2</sub> as a high-performance anode material for sodium-ion batteries. *Adv. Funct. Mater.* **2016**, *26*, 6728–6735.

- [8] Shen, L.F.; Yu, L.; Yu, X.Y.; Zhang, X.J.; Lou, X.W. Self-templated formation of uniform NiCo<sub>2</sub>O<sub>4</sub> hollow spheres with complex interior structures for lithium-ion batteries and supercapacitors. *Angew. Chem. Int. Ed.* **2015**, *54*, 1868–1872.
- [9] Hao, Q.Y.; Cui, G.L.; Zhao, Y.; Bakenov, Z. Flower-like MoSe<sub>2</sub>/MoO<sub>2</sub> composite with high capacity and long-term stability for lithium-ion battery. *Nanomaterials* **2019**, *9*, 1256.
